# Supplementary material for: Downregulation of Mcl-1 by Panobinostat Potentiates Proton Beam Therapy in Hepatocellular Carcinoma Cells
Source: MDPI journal article supplement (doi:10.3390/cells10030554), 2021-03-04
Supplement: s1 [file s1]

**Fig. 4A**

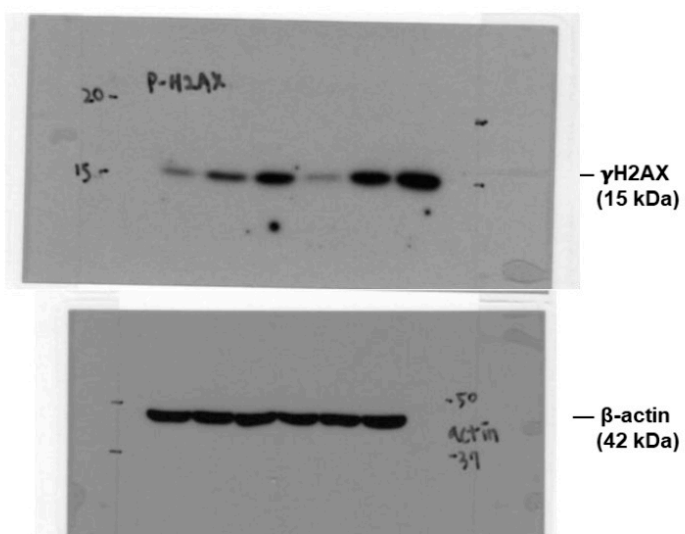

**Fig. 5A**

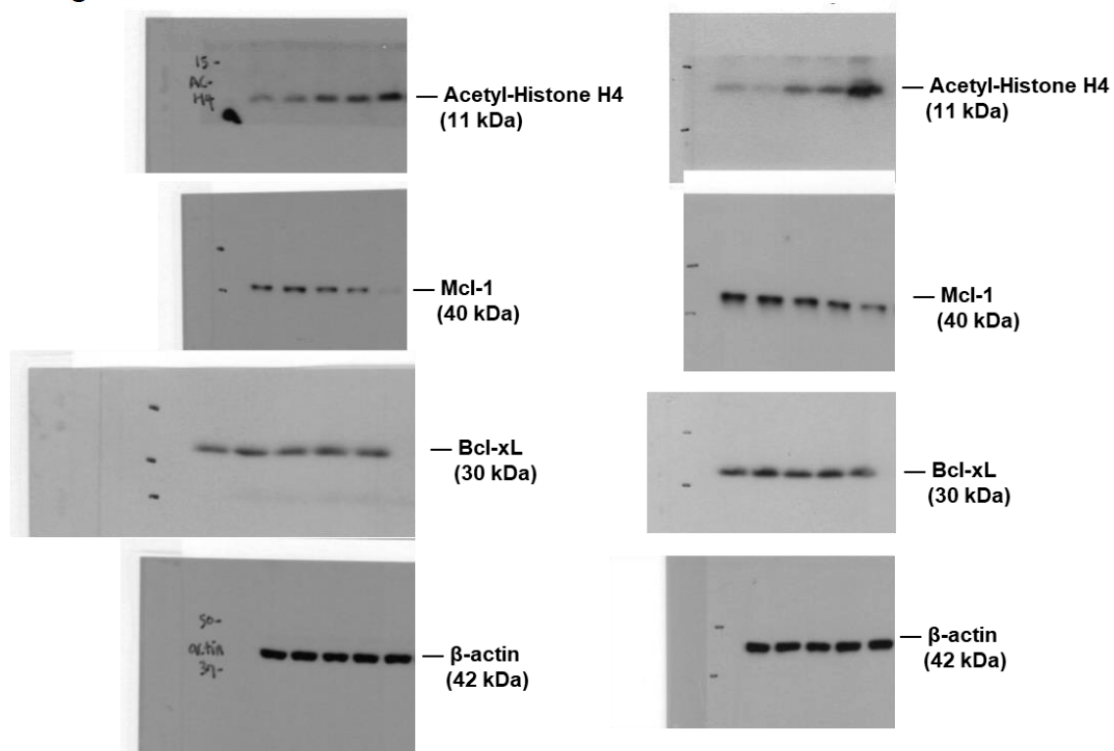

**Supplementary Figure S1.** Uncropped images of western blots.

**Fig. 5B**

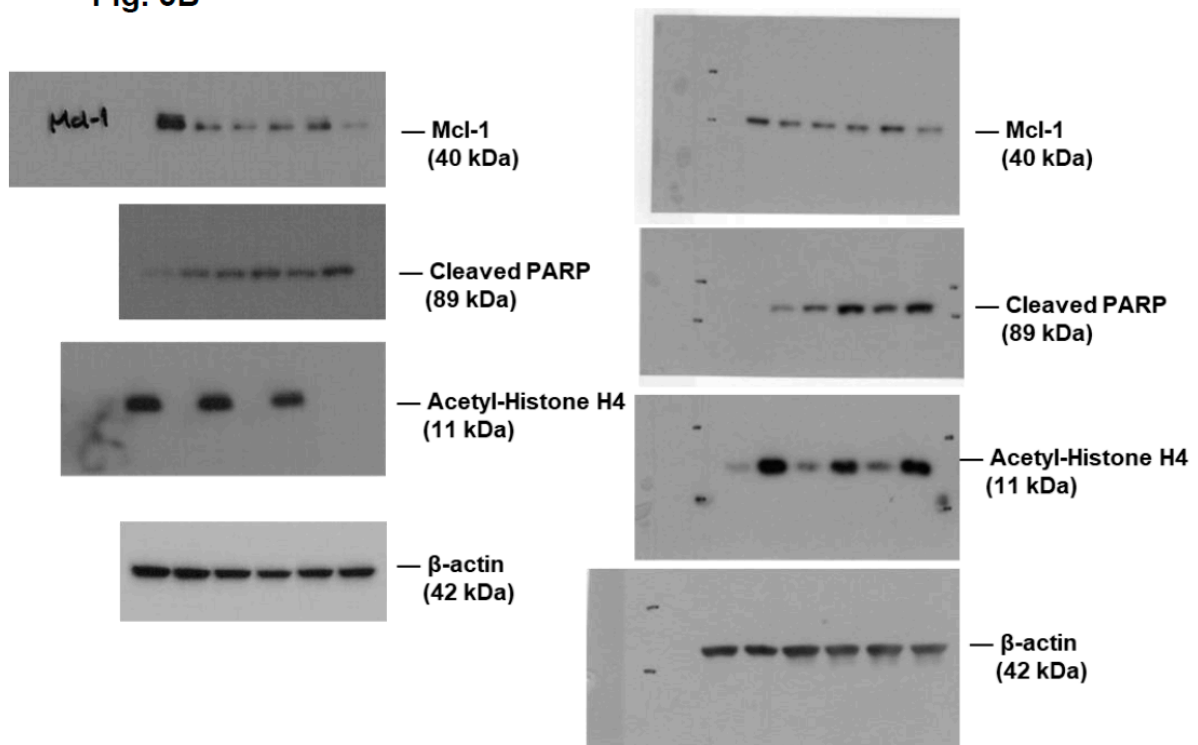

**Fig. 6A**

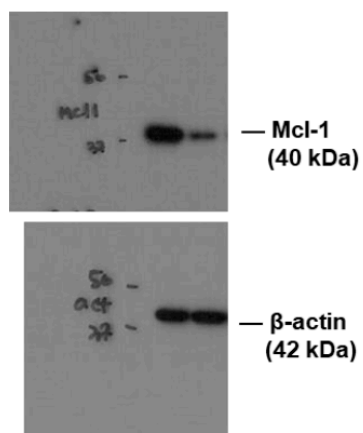

**Supplementary Figure S1.** Uncropped images of western blots (continued).

**Supplementary Table S1.** Plating efficiency of Huh7 and Hep3B cells treated with DMSO, panobinostat and siRNAs.

| Cell line | Treatment    | Plating efficiency (%) |
|-----------|--------------|------------------------|
| Huh7      | DMSO         | 32.44 ± 3.69           |
|           | Panobinostat | 27.67 ± 2.31           |
| Hep3B     | DMSO         | 46.11 ± 2.34           |
|           | Panobinostat | 39.33 ± 1.67           |
| Huh7      | siControl    | 32.33 ± 4.31           |
|           | siMcl-1      | 24.17 ± 3.55           |
